# Supplementary material for: Follistatin expressed in mechanically-damaged salivary glands of male mice induces proliferation of CD49f+ cells
Source: PubMed Central journal article supplement (PMC7673039; doi:10.1038/s41598-020-77004-2), 2020-11-17
Supplement: 41598_2020_77004_MOESM1_ESM.pdf [file 41598_2020_77004_MOESM1_ESM.pdf]

# **Follistatin Expressed in Mechanically-damaged Salivary Glands of Male Mice Induces Proliferation of CD49<sup>f</sup> Cells**

A. Ikeda, T. Yamamoto, J. Mineshiba, S. Takashiba

## **Supplementary Figures and table Legends**

### **Supplementary Table 1**

PCR primers for RT-qPCR

### **Supplementary Figure 1.**

RT-qPCR analysis for down-regulated genes is shown in Figure 1(B) in freshly-isolated CD49<sup>f</sup> cells: mRNA quantities of *Spp1* and *Gdf10* were determined relative to *Glucuronidase beta (Gusb)* by using the  $\Delta\Delta C_t$  method, and fold induction was shown. CD49<sup>f</sup> cells (solid bars), CD49<sup>f</sup> cells (open bars). One set of experiments was performed using the total RNA extracted from CD49<sup>f</sup> and CD49<sup>f</sup> cells fractionated from the salivary glands of 3 mice, and 3 sets of experiments carried out independently. \* $P < 0.05$ , Student's *t* test.

### **Supplementary Figure 2.**

Macroscopic analysis of salivary glands (upper panels) and microscopic analysis of hematoxylin-eosin staining of the sections (lower panels) chronologically after releasing the ligation of main excretory ducts. The control sample had no ligation. Typical images are shown in 3 independent experiments, and 1 experiment was performed using a pair of salivary glands and one paraffin block from 1 mouse. Orange scale bar: 10 mm, and green scale bar: 1 mm.

### **Supplementary Figure 3.**

Whole images of western blotting of intracellular FST protein in cultured CD49f<sup>+</sup> cells: 1 experiment was performed using protein extracts of sub-cultured CD49f<sup>+</sup> cells fractionated from the salivary glands of 3 mice, and 3 independent experiments (#1-3) were carried out, and blot #2 was used for Figure 5. See Figure 5 for details. M: molecular weight marker.

### **Supplementary Figure 4.**

Weight of salivary glands after release of main duct ligation (control: no ligation side at opposite side in the same mouse). The experiment was performed using a pair of salivary glands from 1 mouse, and 3 independent experiments were carried out. N.S.: No significant difference, \* $P < 0.05$ , one-way ANOVA and Tukey's HSD test.

### **Supplementary Figure 5.**

(A) Cell colonies of CD49f<sup>+</sup> after 7, 10, 13, and 16 days.

(B) Cell shape of CD49f<sup>+</sup> and CD49f<sup>-</sup>, cultured for 14 days.

Typical microscopic images are shown. One set of experiments was performed using CD49f<sup>+</sup> and CD49f<sup>-</sup> cells fractionated from the salivary glands of 3 mice were used per experiment, and 3 sets of experiments were carried out independently. Scale bar: 100  $\mu\text{m}$ .

### **Supplementary Figure 6.**

Immunostaining of albumin and  $\alpha$ -1 fetoprotein in cultured CD49f<sup>+</sup> cells differentiated into the hepatic lineage: fluorescent immunocytochemistry was performed on CD49f<sup>+</sup> cells on the same slides. Albumin, red;  $\alpha$ -1 fetoprotein,

green; DAPI, blue. Overlaid image of 3 images was colorized in yellow in (a). The experiment was performed using sub-cultured CD49f<sup>+</sup> cells fractionated from the salivary glands of 3 mice, and 3 independent experiments were carried out, and a typical set of images is shown. Scale bar: 10 μm.

### **Supplementary Figure 7.**

Knock-down efficiency of *Fst* expression by siRNA. Total RNA was recovered at day 2 post-transfection and used for synthesis of cDNA (1 μg of total RNA). *Fst* mRNA expression was analyzed by using qPCR and shown after normalization to *β-Actin*. Non target siRNA was used as a negative control. The experiment was performed using sub-cultured CD49f<sup>+</sup> cells fractionated from the salivary glands of 3 mice, and 3 independent experiments were carried out. \* $P < 0.05$ , Student's *t* test.

### **Supplementary Figure 8.**

Whole images of western blotting used in Figure 2(A). A representative set of blots of 3 independent experiments is shown. See Figure 2 for details.

### **Supplementary Figure 9.**

Ct values of RT-qPCR analysis for *β-Actin*, *Acvr2a*, and *Acvr2b* in cultured CD49f<sup>+</sup> cells. One experiment was performed using sub-cultured CD49f<sup>+</sup> cells fractionated from the salivary glands of 3 mice, and 3 independent experiments were carried out.

| Target genes     | Primers                                                                     | Product length (bp) |
|------------------|-----------------------------------------------------------------------------|---------------------|
| <i>Csf1</i>      | F: 5' - GGCATCATCCTAGTCTTGCTG - 3'<br>R: 5' - TTCCACCTGTCTGTCCTCATC - 3'    | 147                 |
| <i>Inhbb</i>     | F: 5' - CGAGATCATCAGCTTTGCAG - 3'<br>R: 5' - TGCACCACGAATAGGTTCTG - 3'      | 102                 |
| <i>Tgfa</i>      | F: 5' - TGGGTATCCTGTTAGCTGTGTG - 3'<br>R: 5' - CTTGTTGAAGTGAGACACCACTG - 3' | 98                  |
| <i>Inhba</i>     | F: 5' - ATCATCACCTTTGCCGAGTC - 3'<br>R: 5' - GTTAGCCTTGGGGACTTTCAG - 3'     | 129                 |
| <i>Inha</i>      | F: 5' - GGCTATCCTTTTCCCAGCTAC - 3'<br>R: 5' - GATGGCCGGAATACATAAGTG - 3'    | 108                 |
| <i>Fst</i>       | F: 5' - TCTTCTGGCGTGCTTCTTG - 3'<br>R: 5' - CCTCTTCCTCCGTTTCTTCC - 3'       | 73                  |
| <i>Gusb</i>      | F: 5' - TCCAAGGGGTCAATAAGCAC - 3'<br>R: 5' - CAACGGAGCAGGTTGAAATC - 3'      | 91                  |
| <i>P-21</i>      | F: 5' - GGAGCATGAATGGAGACAGAG - 3'<br>R: 5' - ATCACCAGGATTGGACATGG - 3'     | 98                  |
| <i>Cyclin D2</i> | F: 5' - CAGTGTGCATGTTCCCTAGCTTC - 3'<br>R: 5' - GTTCCACTTCAGCTTACCCAAC - 3' | 143                 |
| <i>Pcna</i>      | F: 5' - TCACAAAAGCCACTCCACTG - 3'<br>R: 5' - GCTTCCTCATCTTCAATCTTGG - 3'    | 136                 |
| <i>Spp1</i>      | F: 5' - GAGGAAACCAGCCAAGGTAAG - 3'<br>R: 5' - ATCACTGCCAATCTCATGGTC - 3'    | 99                  |
| <i>Gdf10</i>     | F: 5' - AAGTACAACCGAAGAGGTGCTC - 3'<br>R: 5' - GCTGTGAGGATCATTCTGAGTC - 3'  | 140                 |
| <i>Acvr2a</i>    | F: 5' - ACCCTCCTGTACTTGTTCCCTAC - 3'<br>R: 5' - ATTGAGCAACTGGGCTTTCC - 3'   | 137                 |
| <i>Acvr2b</i>    | F: 5' - GTTCATTGCTGCCGAGAAAC - 3'<br>R: 5' - GATGTTCCCCTTGAGGTAATCC - 3'    | 106                 |
| <i>β-Actin</i>   | F: 5' - CTTTTCCAGCCTTCCTTCTTG - 3'<br>R: 5' - GGCATAGAGGTCTTTACGGATG - 3'   | 91                  |

Supplementary Table 1

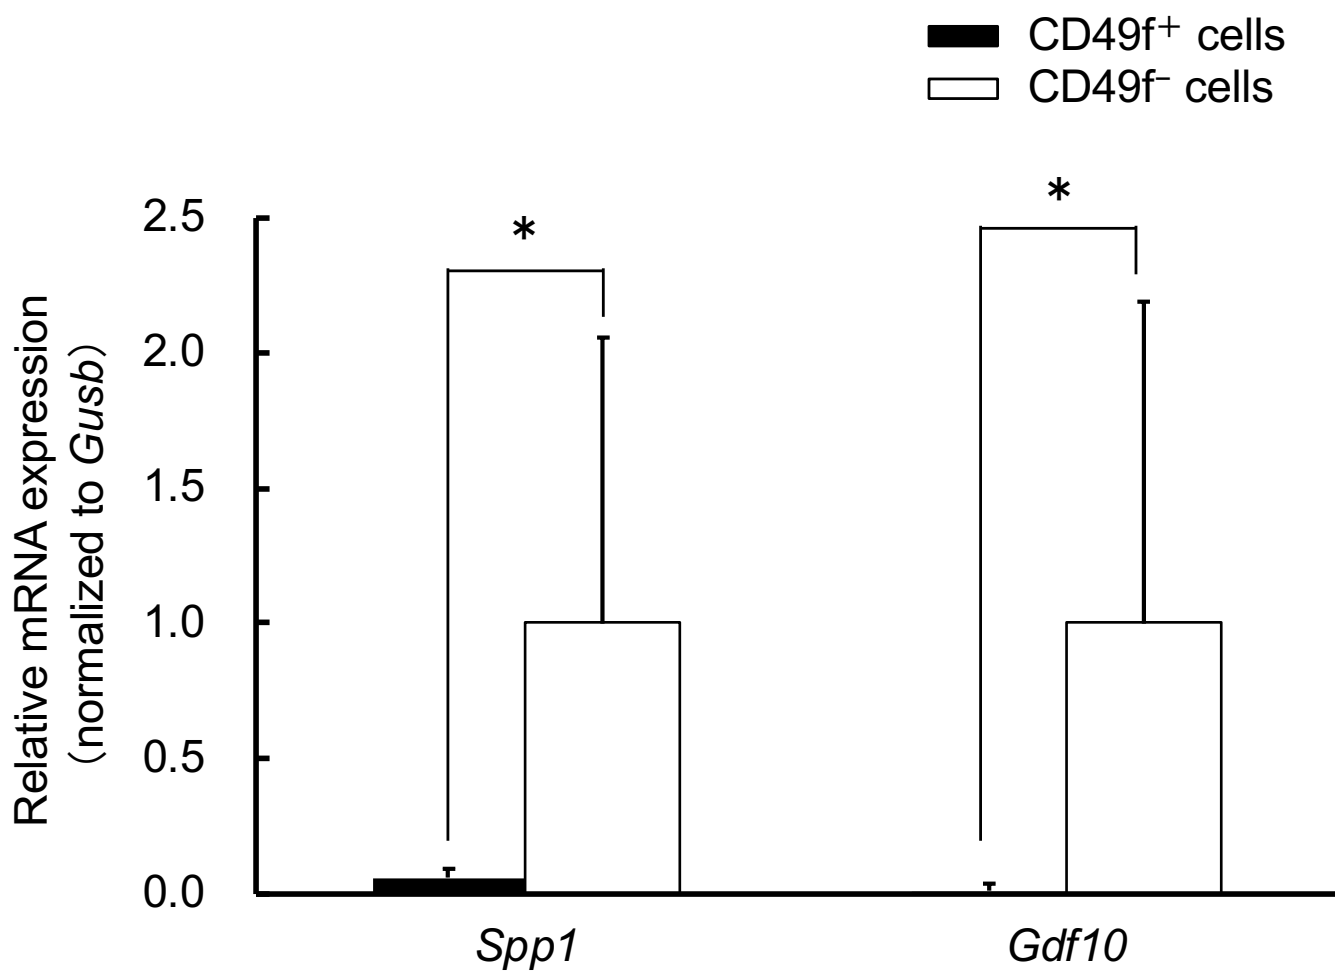

Supplementary Fig. 1

After releasing ligation (days)

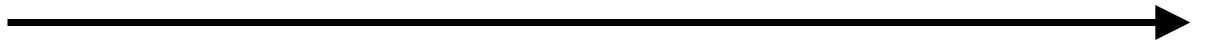

Control

1

2

4

8

16

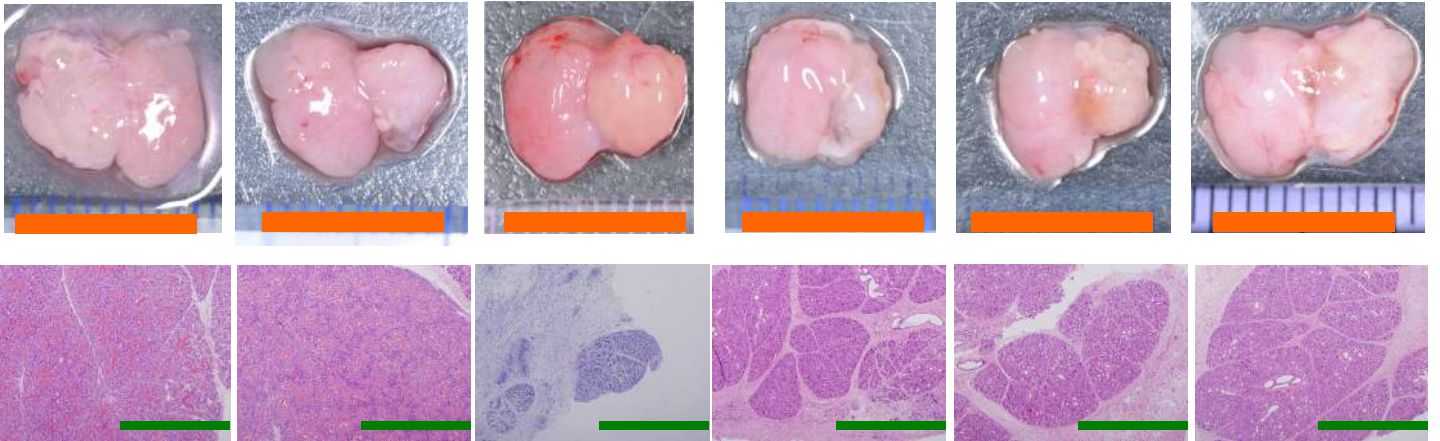

Supplementary Fig. 2

# 1

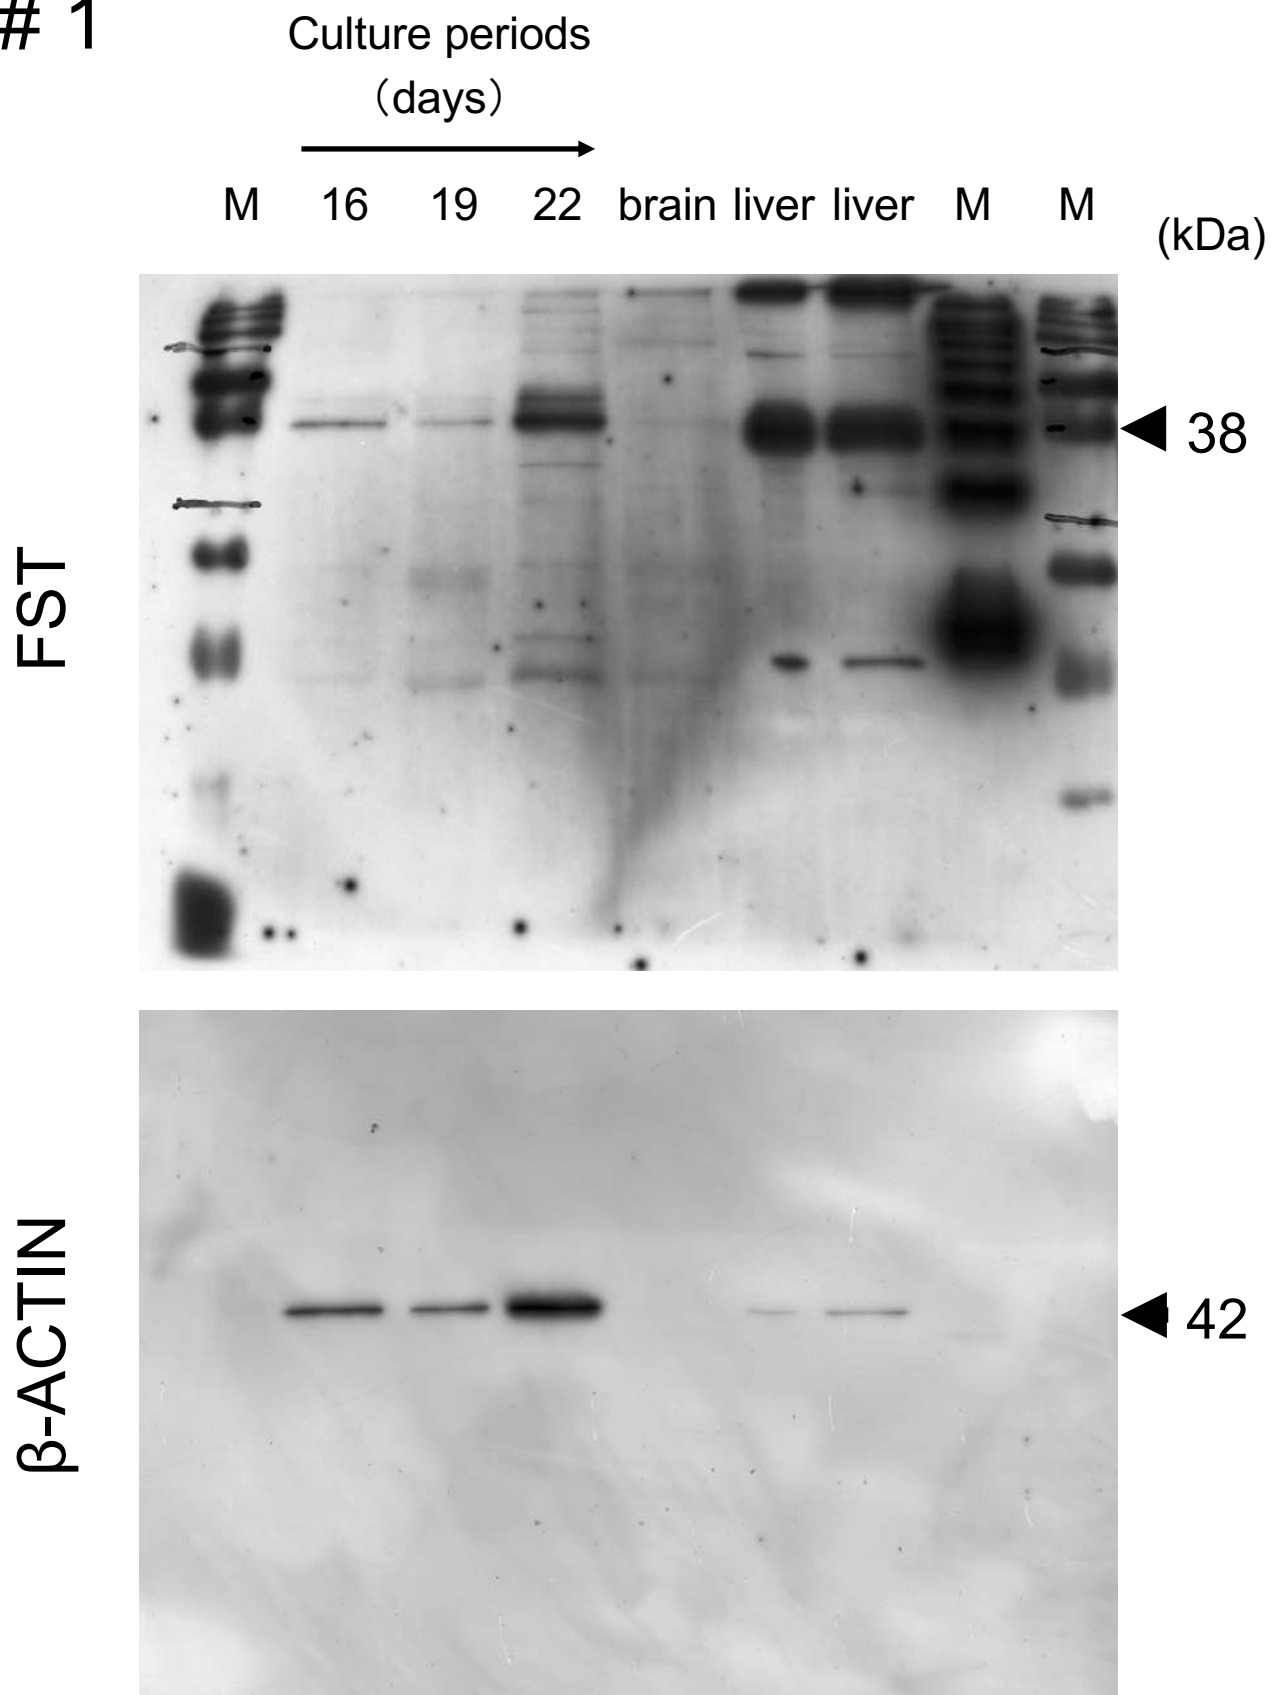

Supplementary Fig. 3

# 2

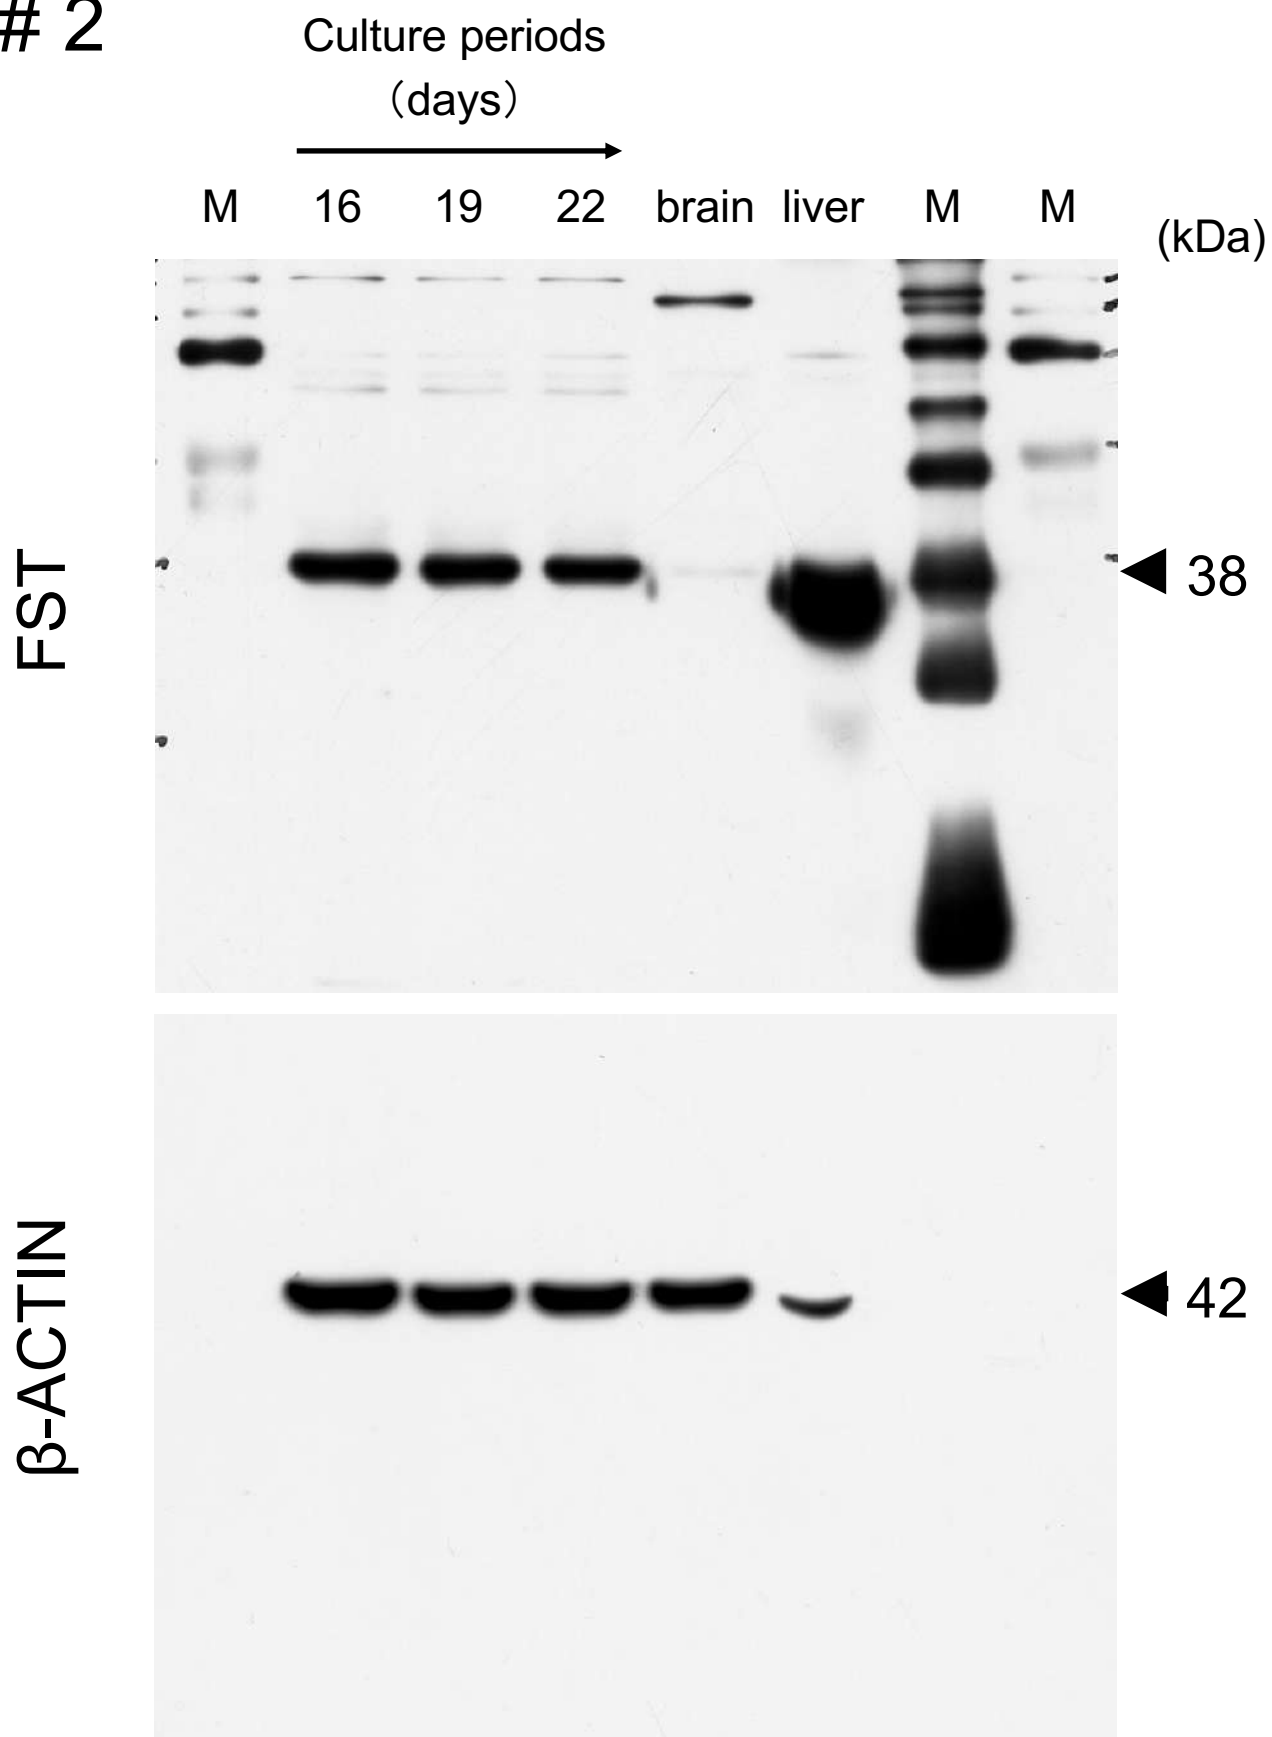

Supplementary Fig. 3



# 3

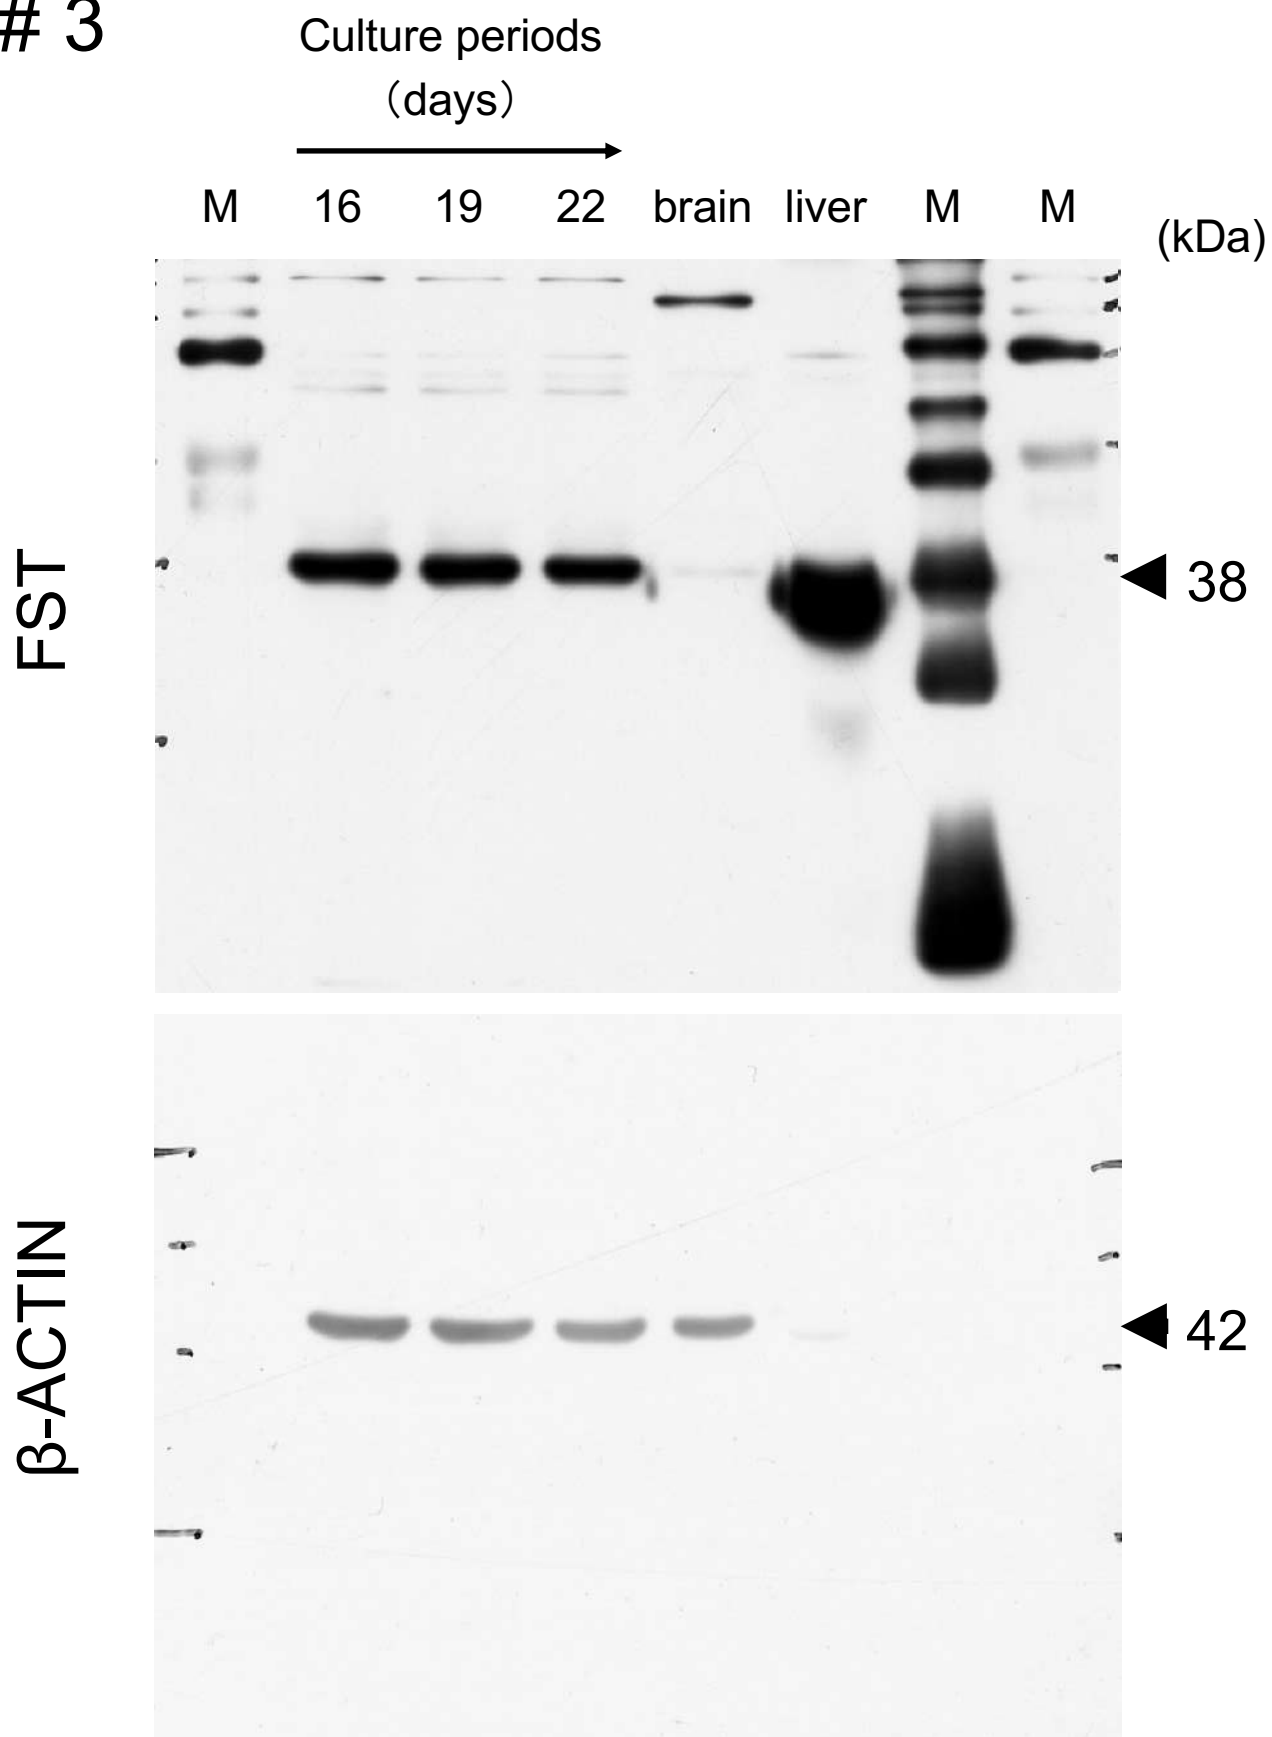

Supplementary Fig. 3

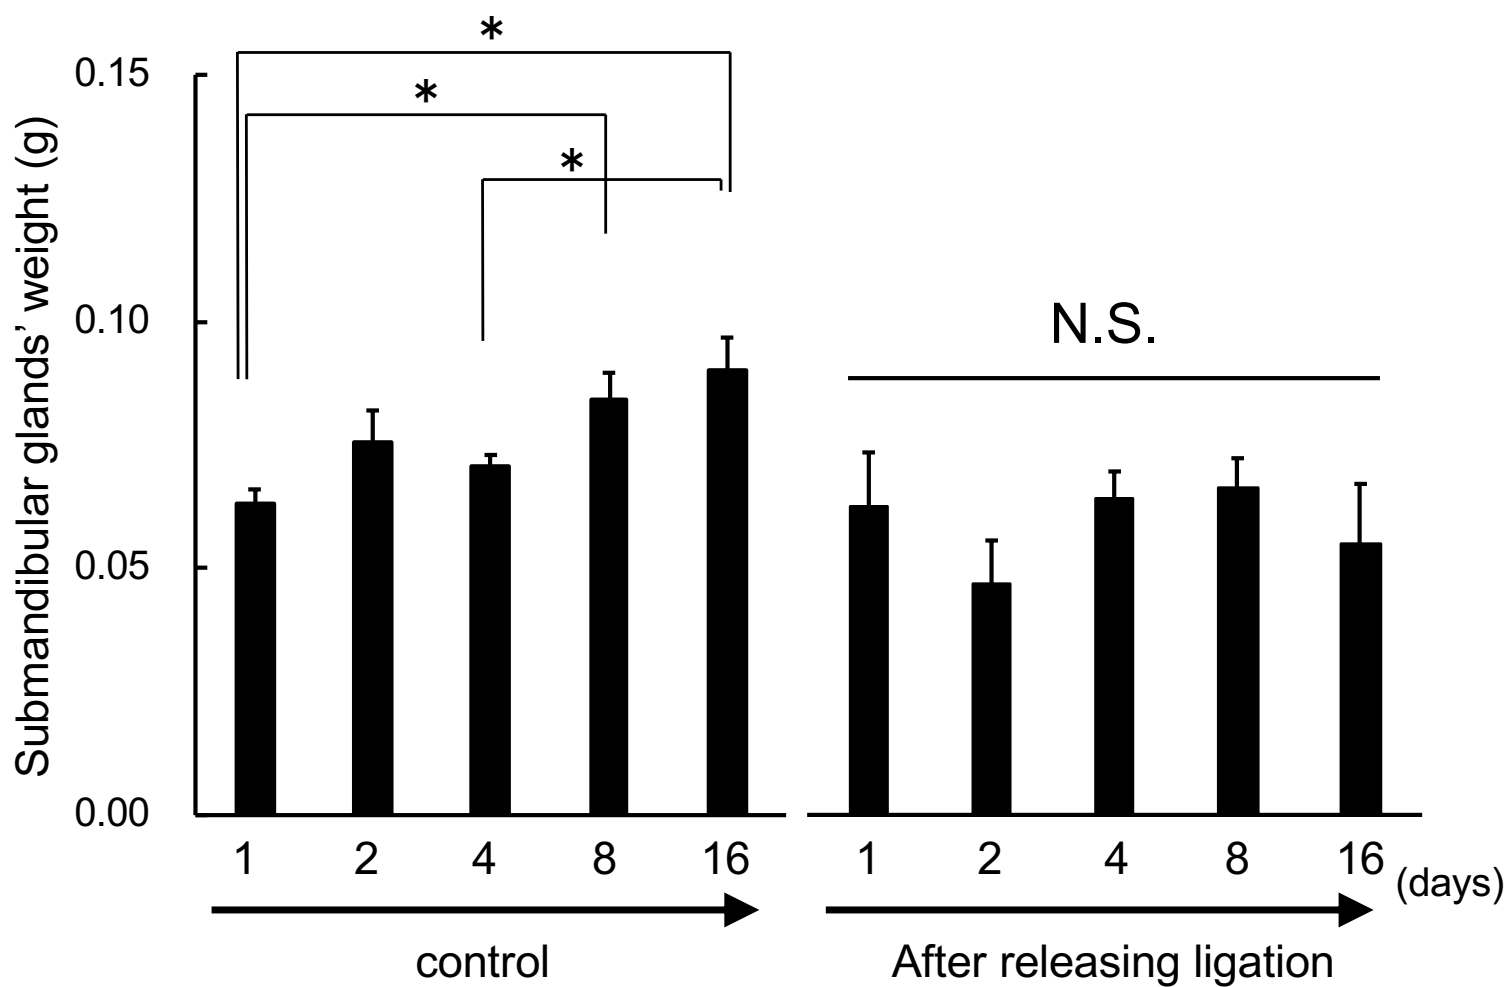

Supplementary Fig. 4

**(A)**

CD49f<sup>+</sup> cells

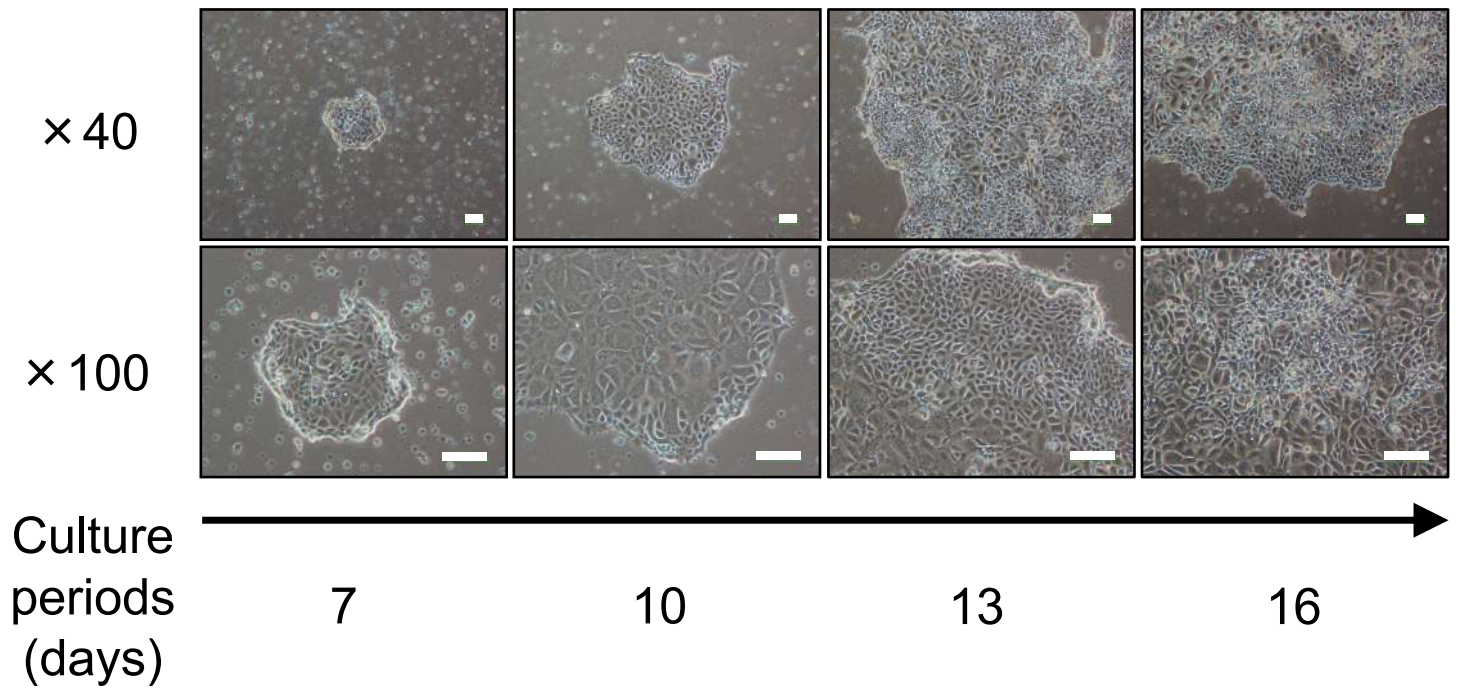

**(B)**

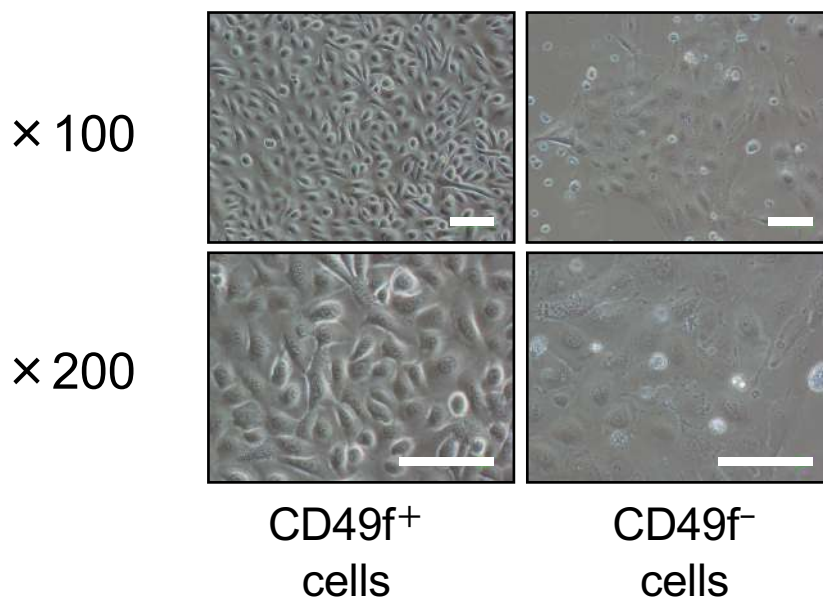

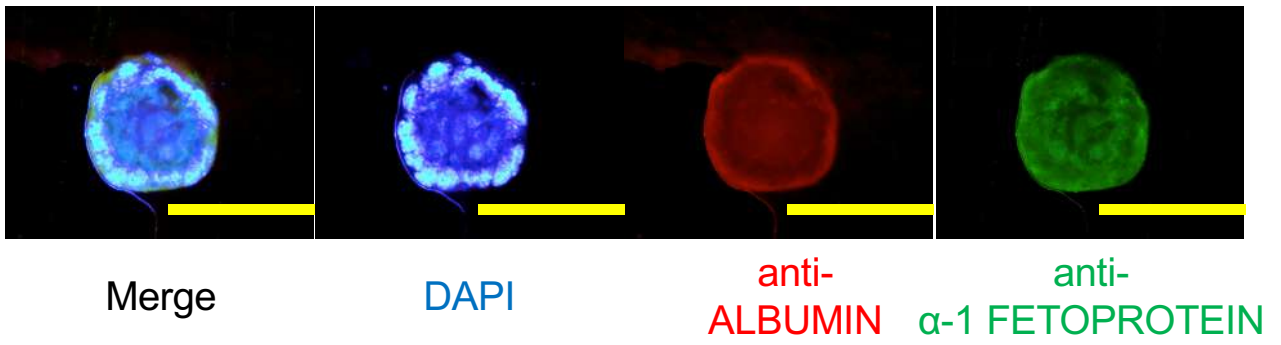

Supplementary Fig. 6

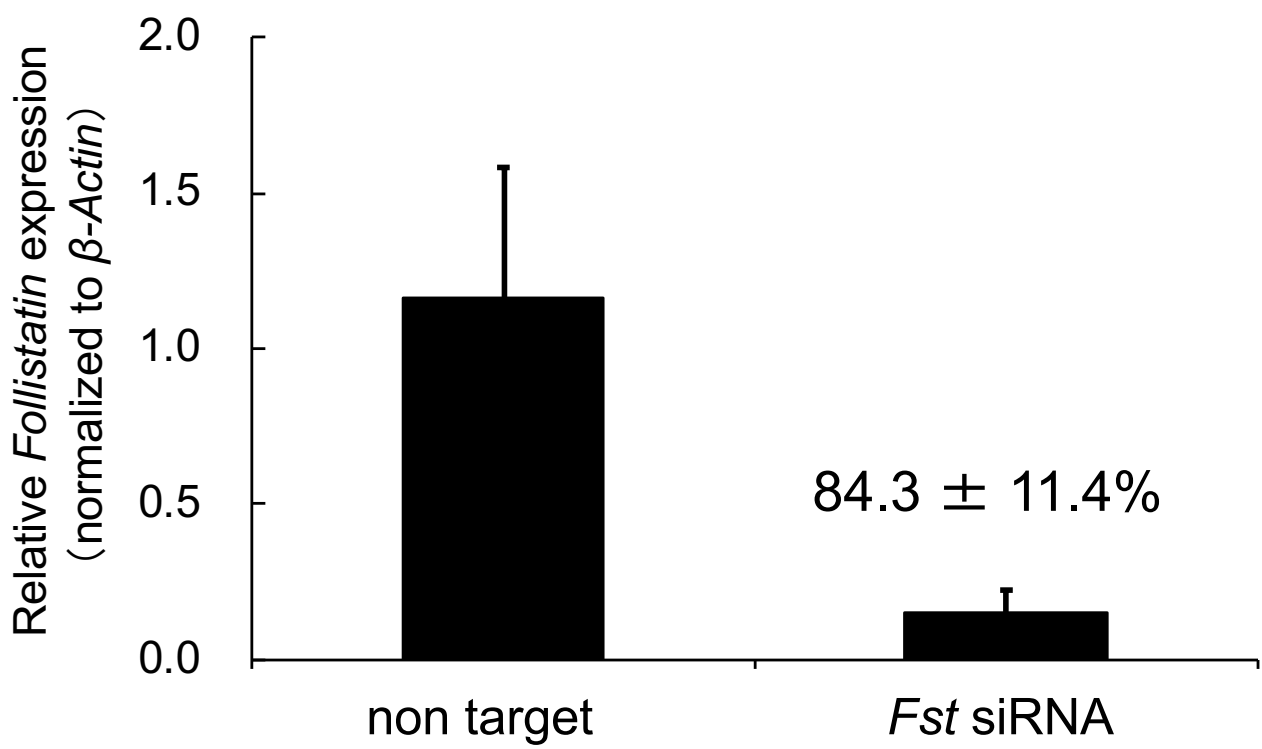

Supplementary Fig. 7

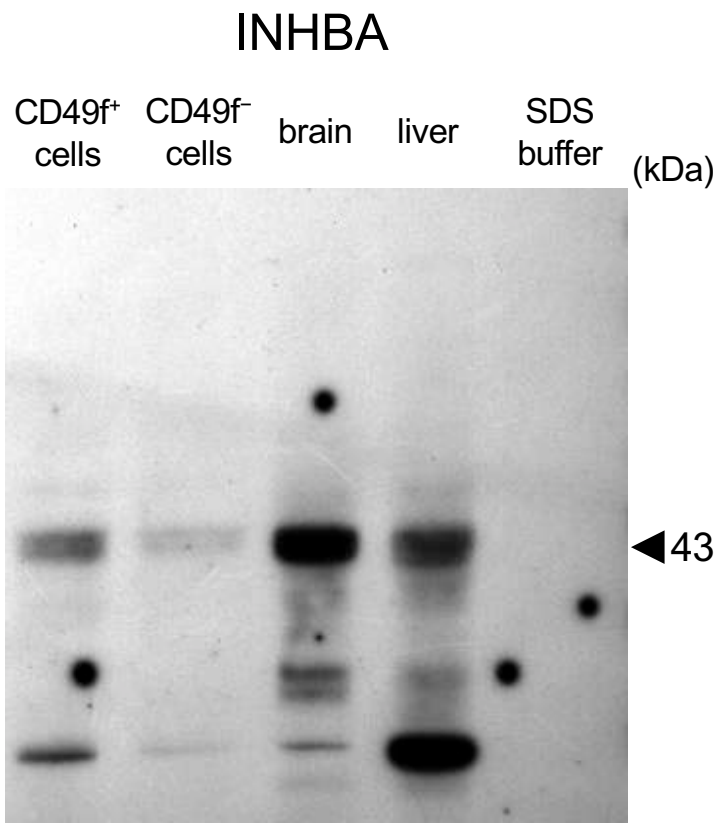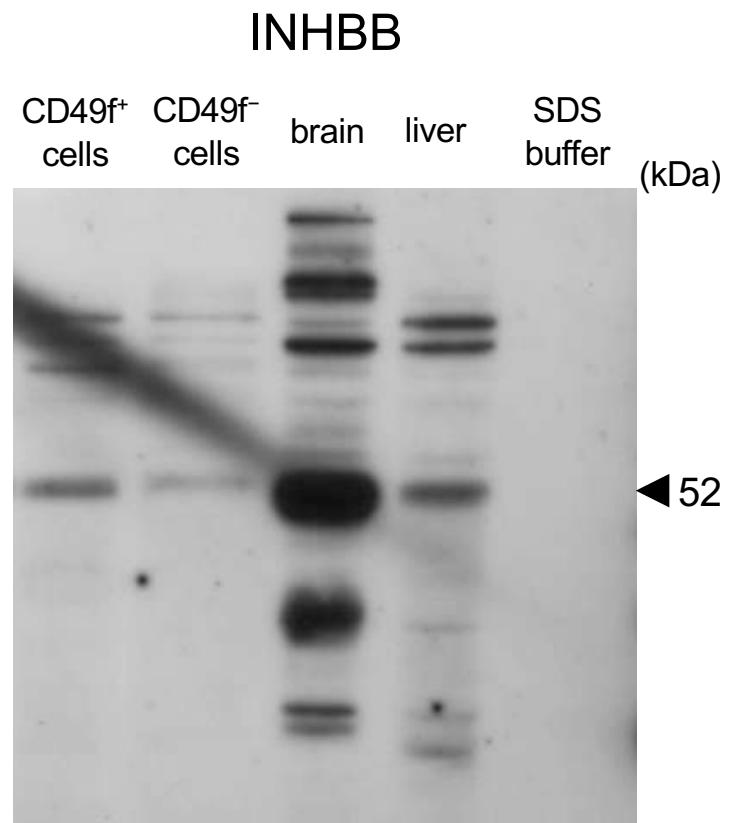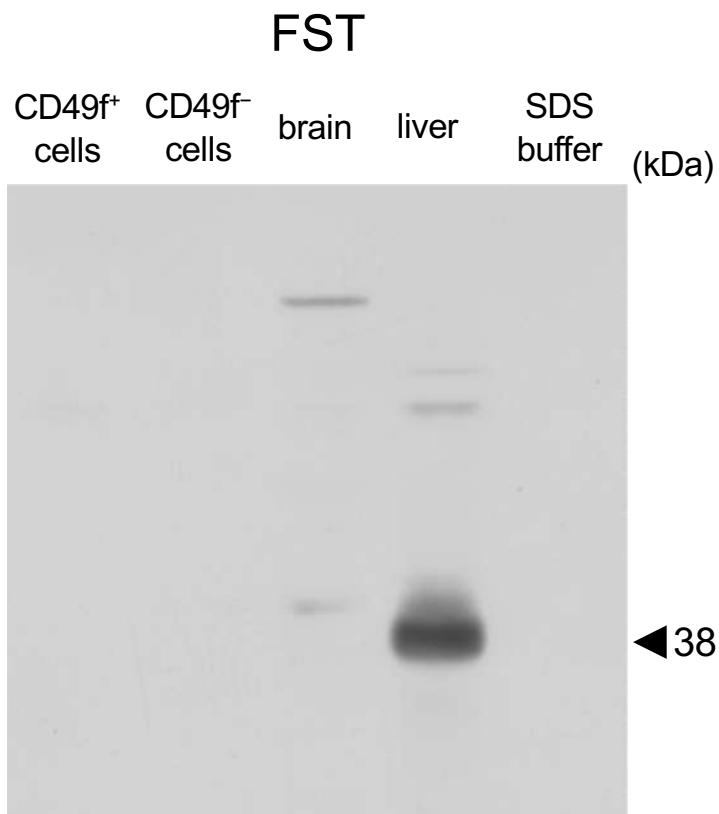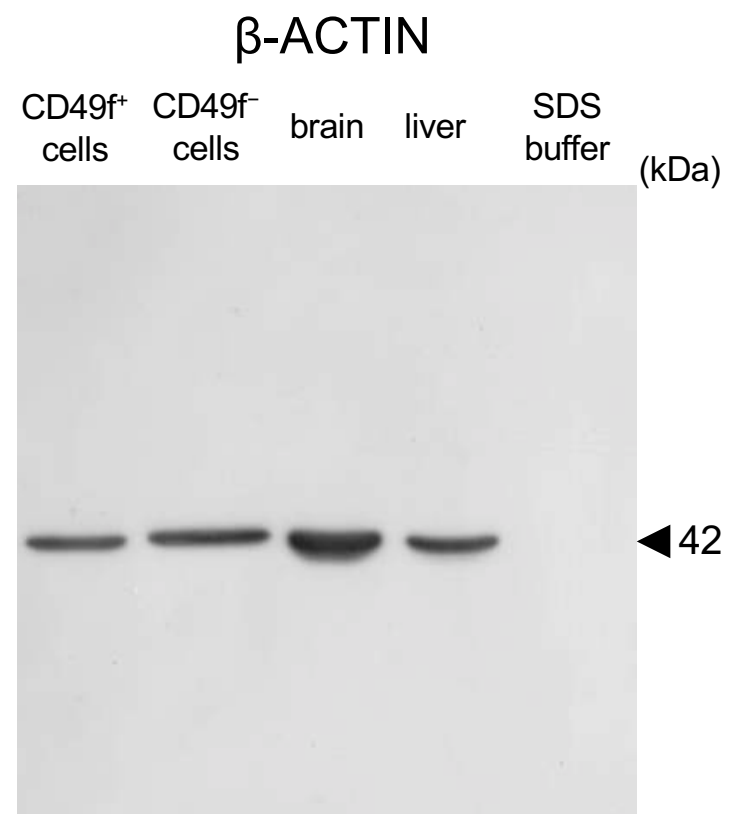

Supplementary Fig. 8

| Gene names                      | Ave. Ct values |
|---------------------------------|----------------|
| <i><math>\beta</math>-Actin</i> | 14.699         |
| <i>Acvr2a</i>                   | 21.326         |
| <i>Acvr2b</i>                   | 24.685         |
